# Supplementary material
Source: PubMed Central journal article supplement (PMC10445406)

**SVEP1**

SVEP1.111109.56

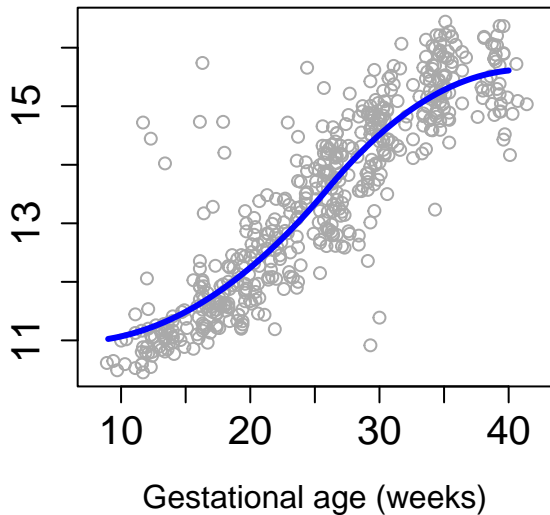**GPC3**

GPC3.4842.62

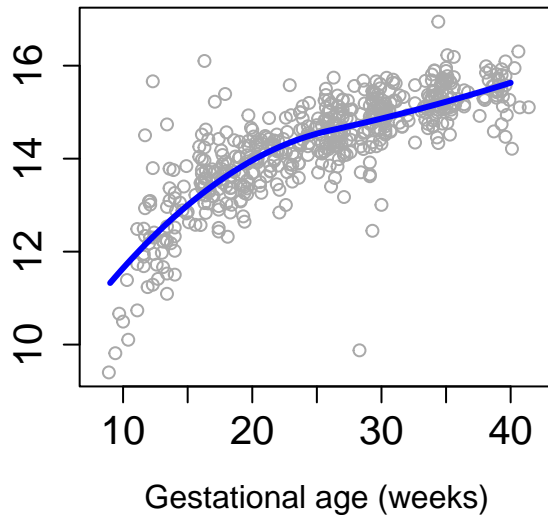**SVEP1**

SVEP1.111178.21

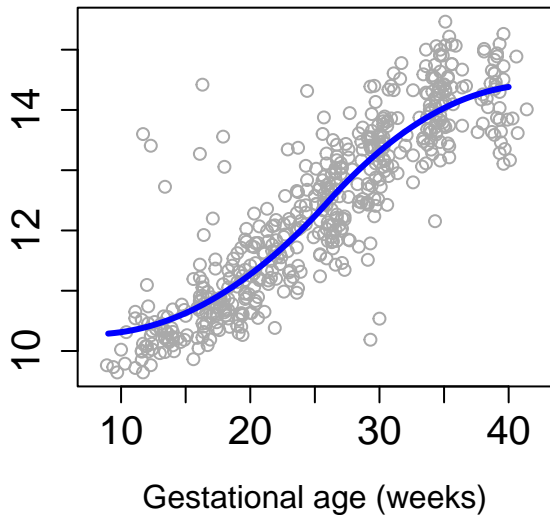**CSH1|CSH2**

CSH1.CSH2.131103.125

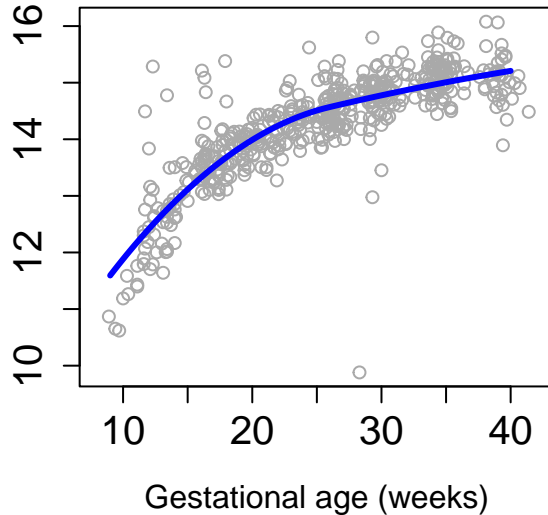

**ALPG**

ALPG:6715.63

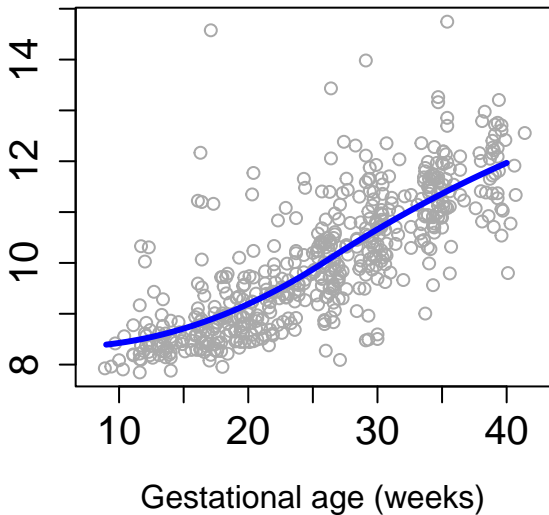**AOC1**

AOC1:6209.2

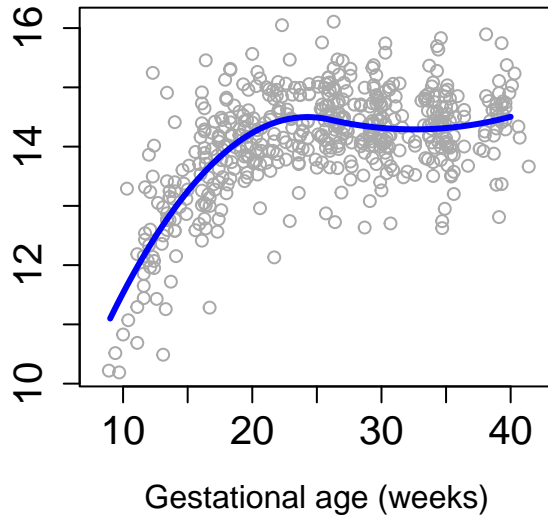**PGF**

PGF:3078.1

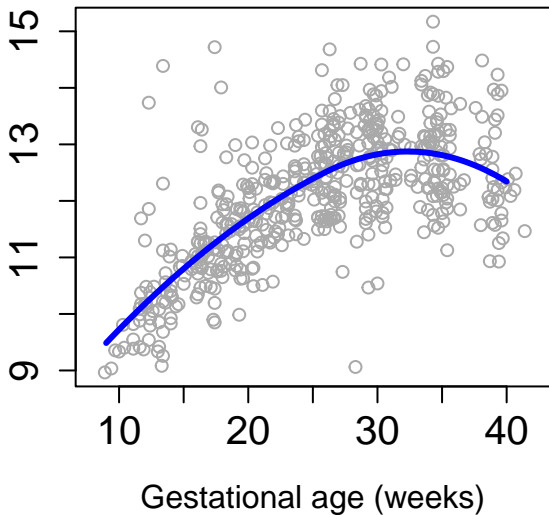**PRG2**

PRG2:7258.5

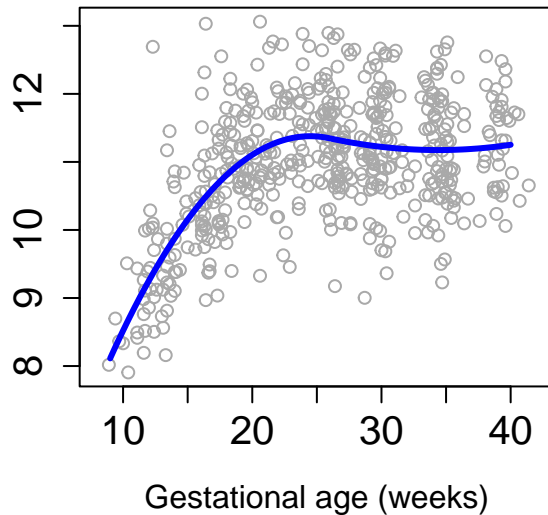

**IGSF3**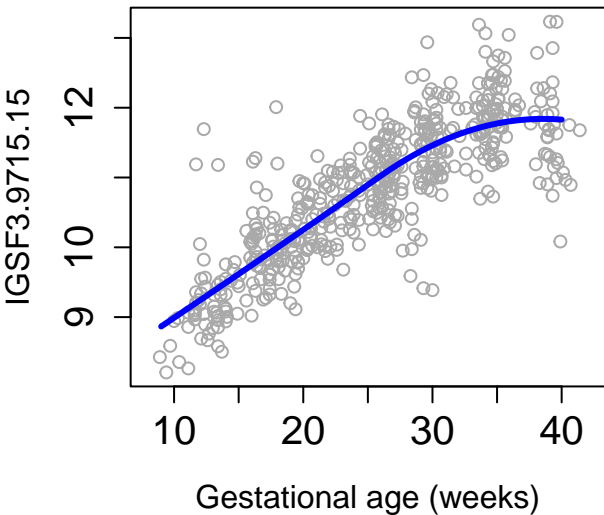**ENTPD1**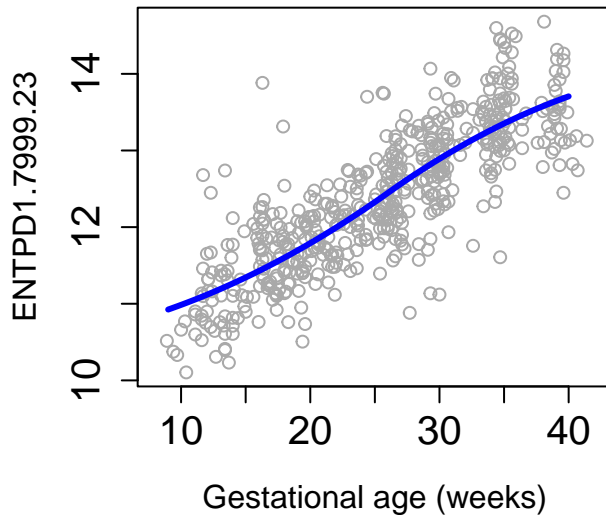**SIGLEC6**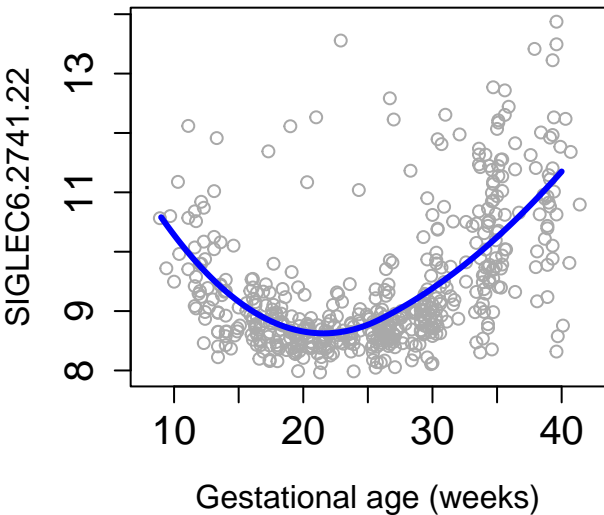**PRL**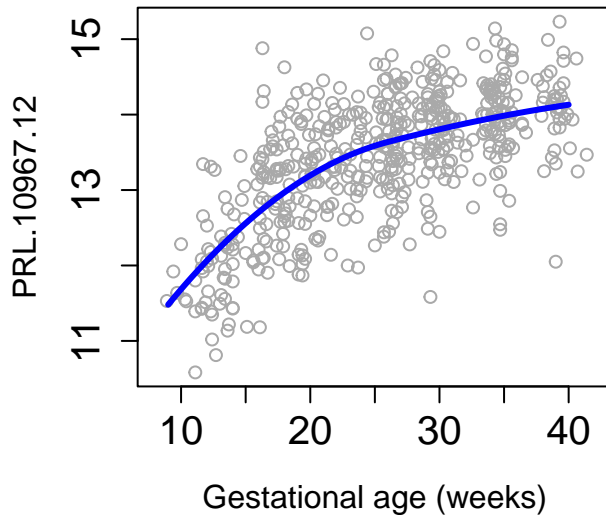

**AOC1**

AOC1.15486.126

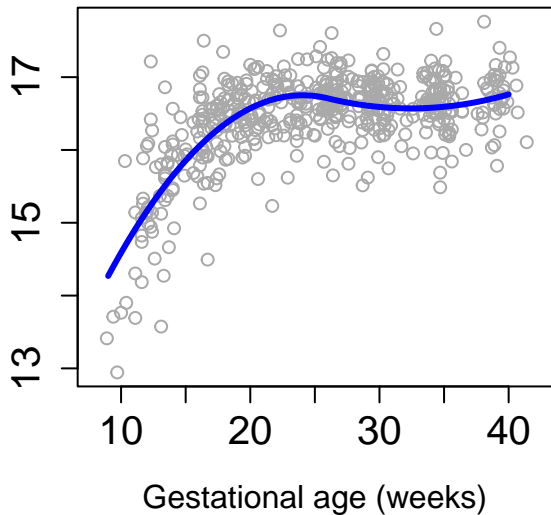**DLK1**

DLK1.6373.54

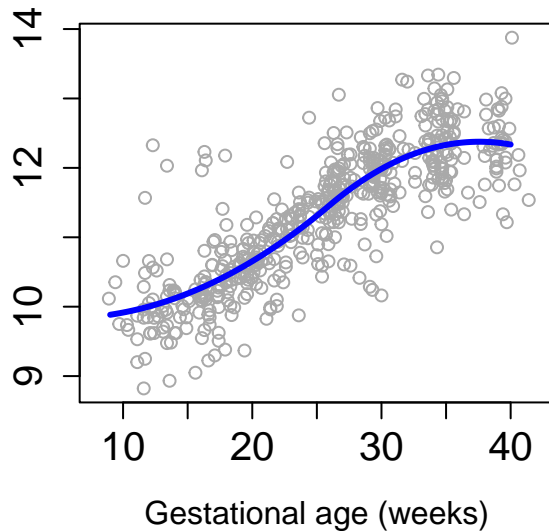**TFF3**

TFF3.8323.163

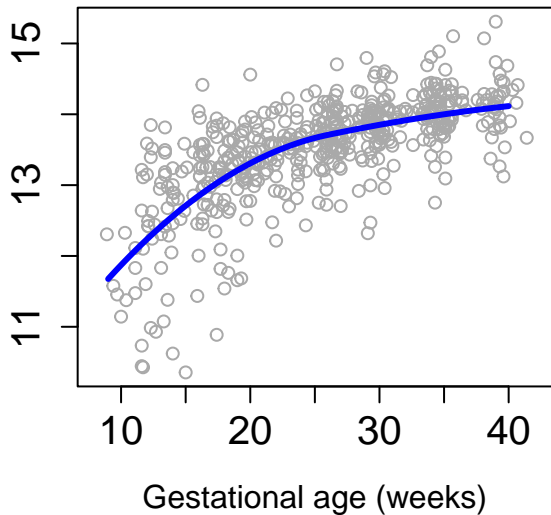**CRH**

CRH.19637.9

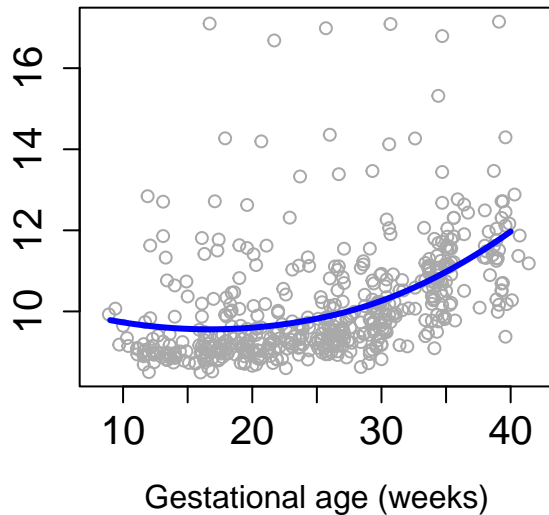

**HID1**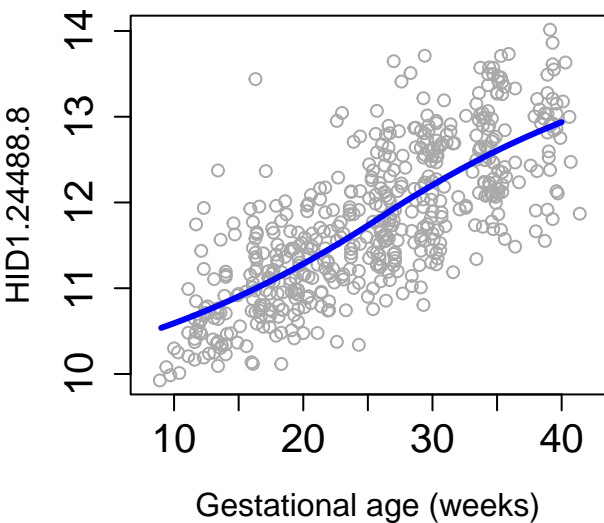**HAMP**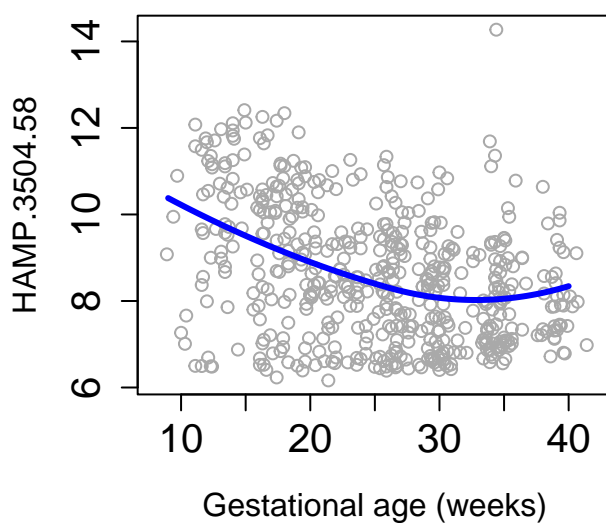**CA6**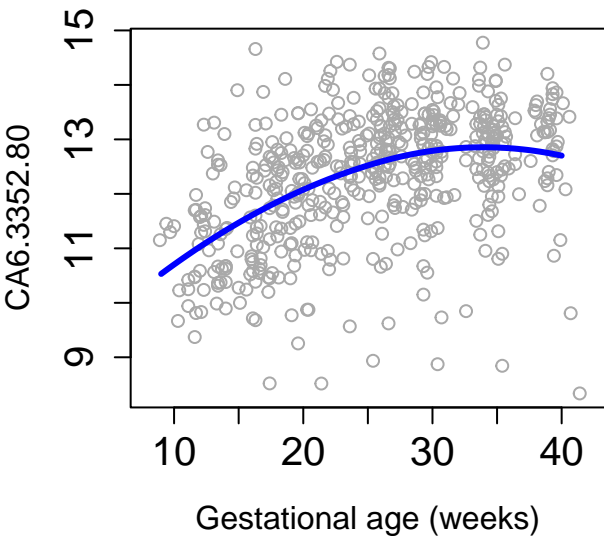**GH2**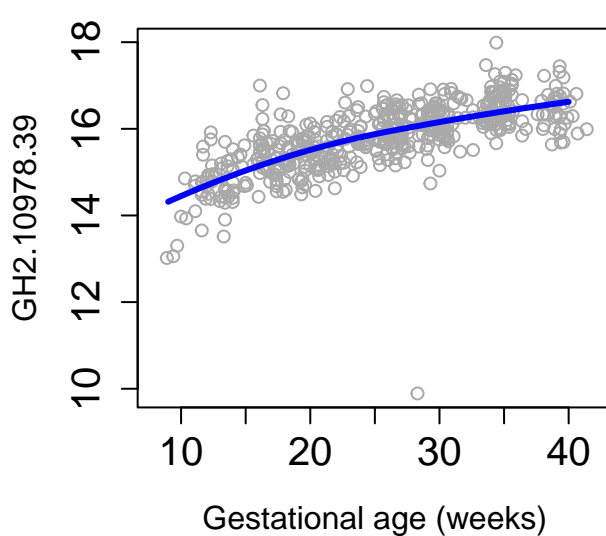

**DLK1**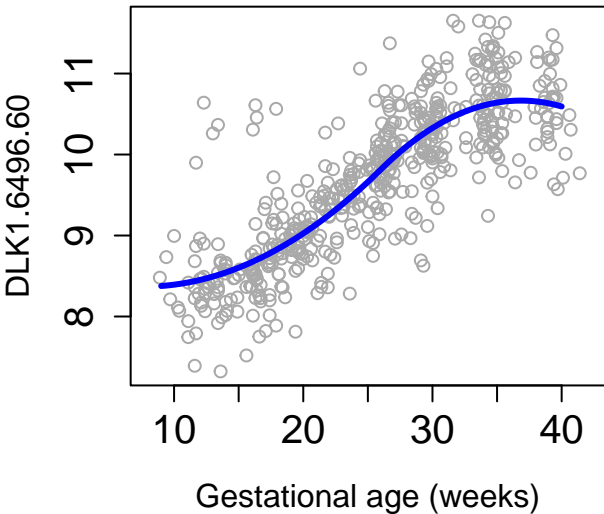**IL1RL1**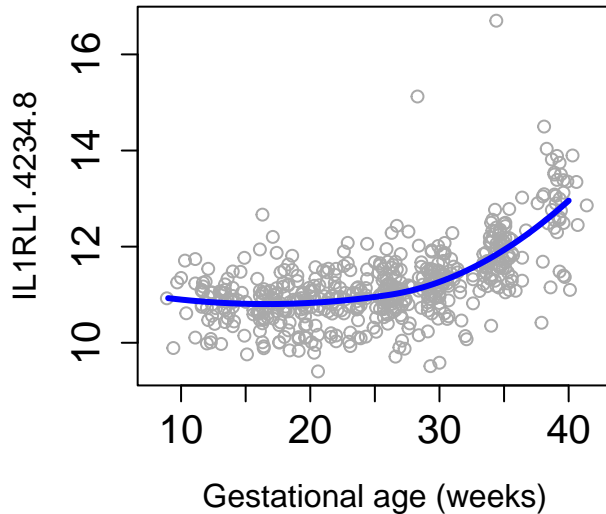**SGSH**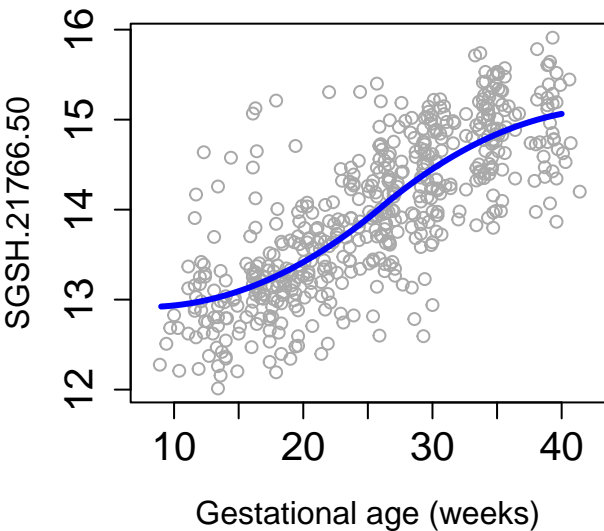**PAPPA**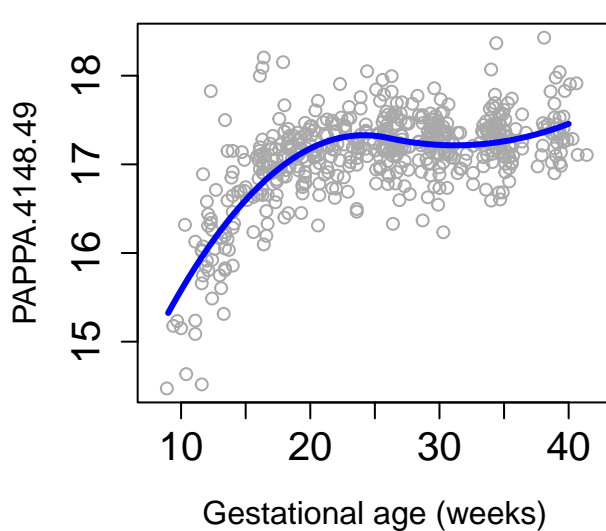

**MAP2K4**

MAP2K4:5242.37

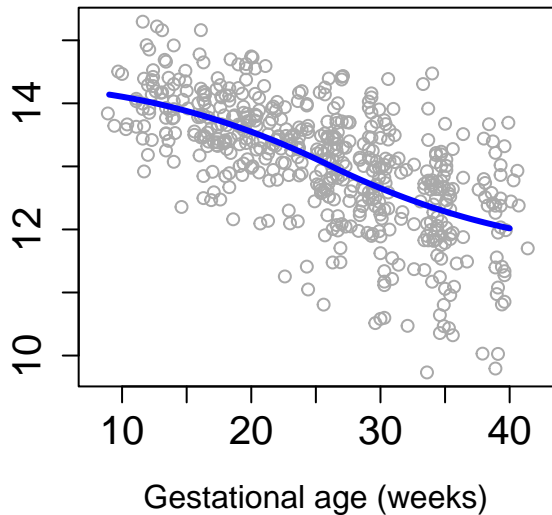**DDR1**

DDR1:11836.144

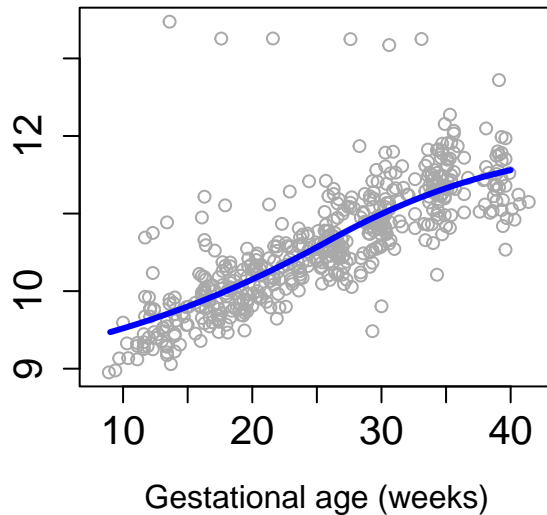**CA6**

CA6:13747.9

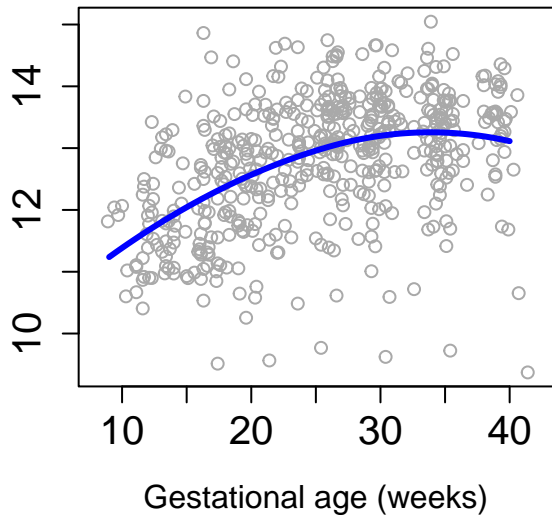**INSL4**

INSL4:6410.26

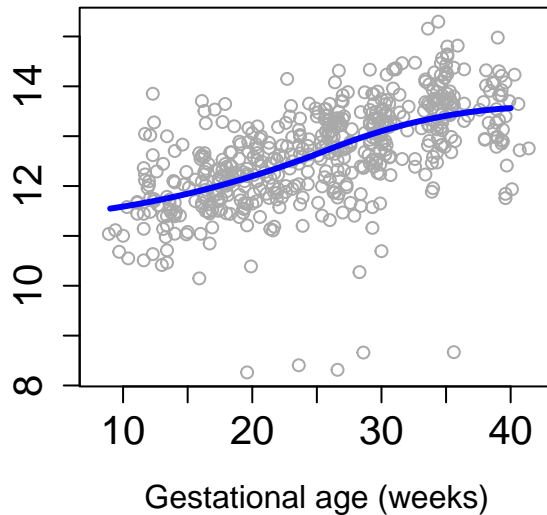

**CGB3**

CGB3.21391.17

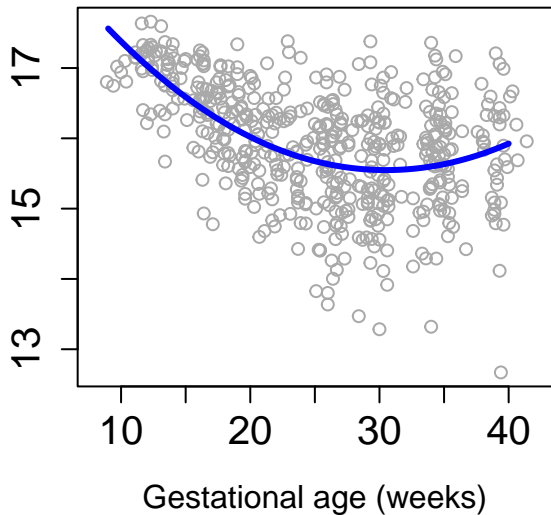**HNF1A**

HNF1A.11193.27

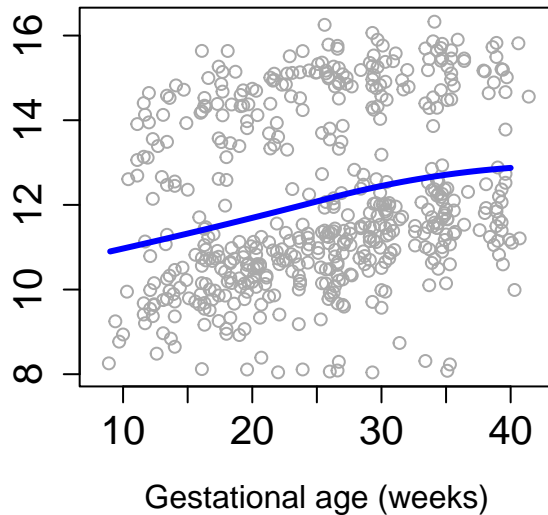**PTPRU**

PTPRU.8337.65

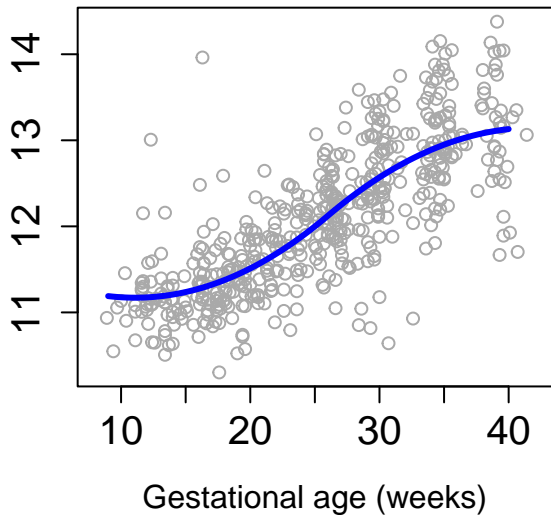**TFPI2**

TFPI2.9233.71

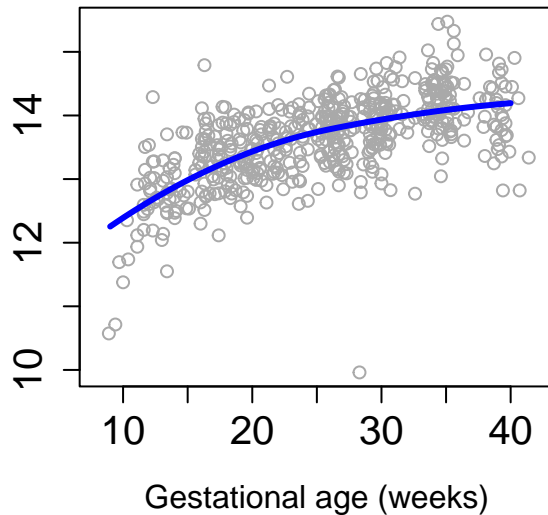



**ITIH5**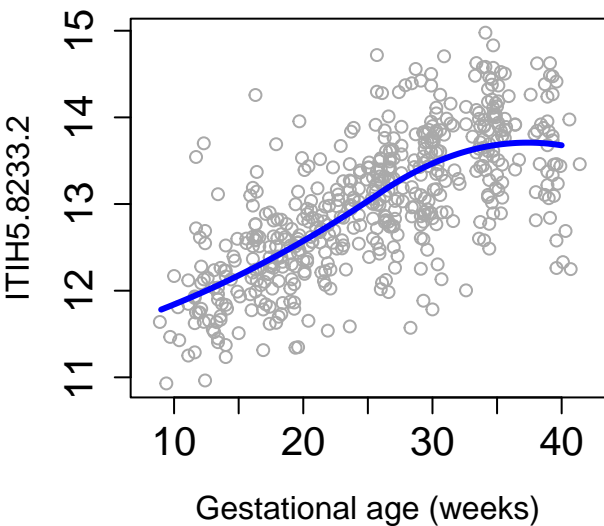**RET**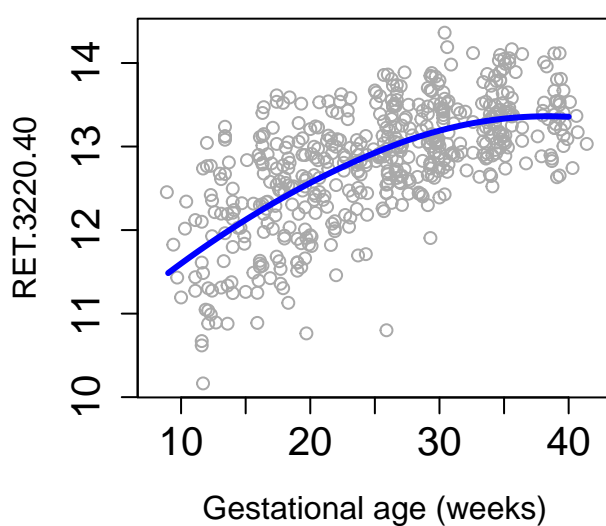**SEMA7A**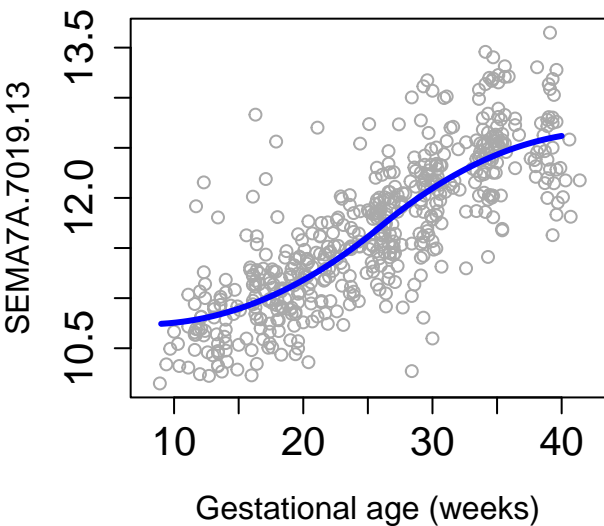**SERPINB2**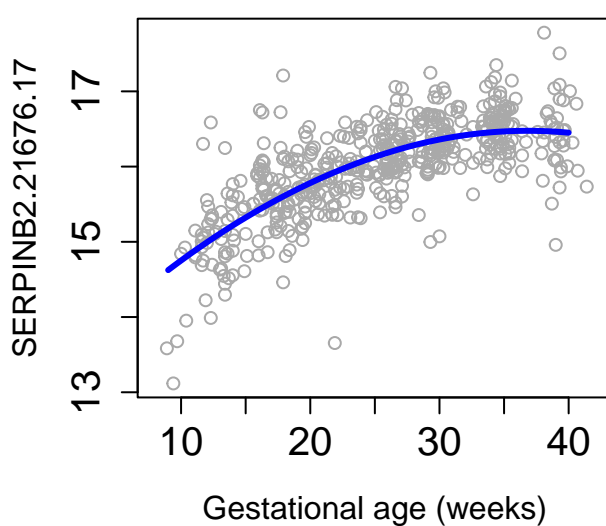

ZNF174

ZNF174.11486.26

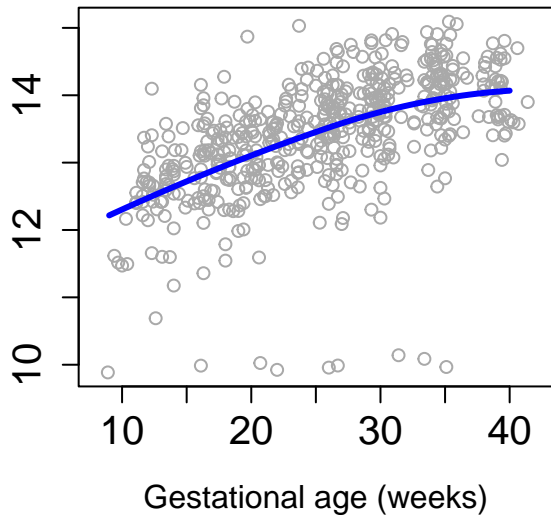

EBI3

EBI3.10851.77

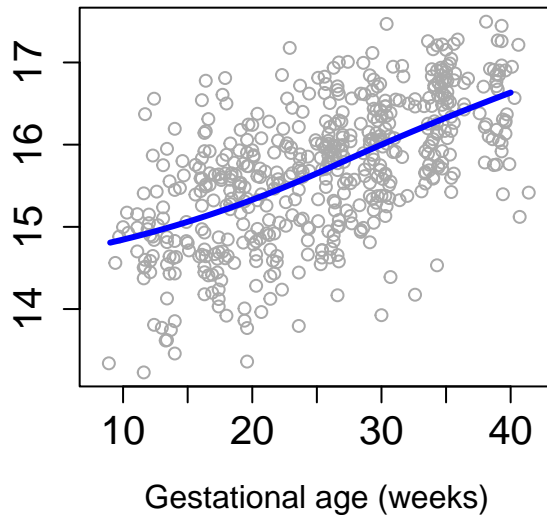

INHBA

INHBA.2748.3

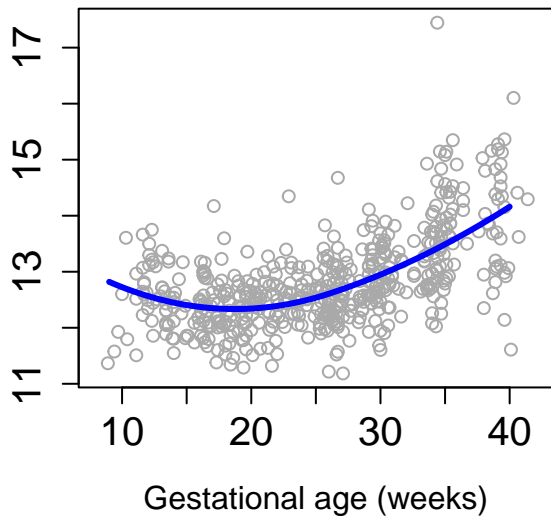

HRG

HRG.4996.66

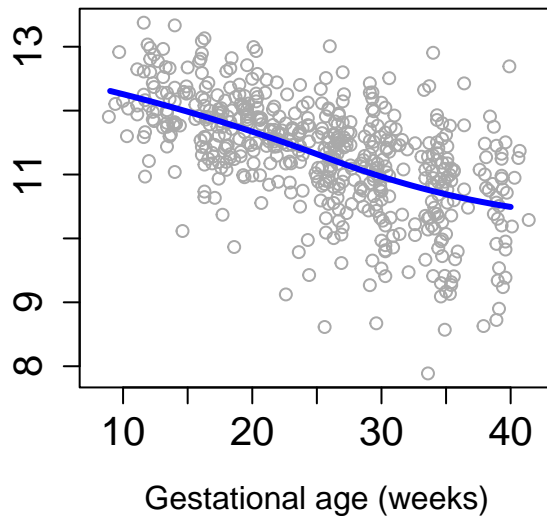

Supplement: NIHMS1907831-supplement-Supplementary_File_2.pdf [file NIHMS1907831-supplement-Supplementary_File_2.pdf]
